# Supplementary material
Source: PubMed Central journal article supplement (PMC8026550)
Supplement: NIHMS1649394-supplement-2.pdf [file NIHMS1649394-supplement-2.pdf]

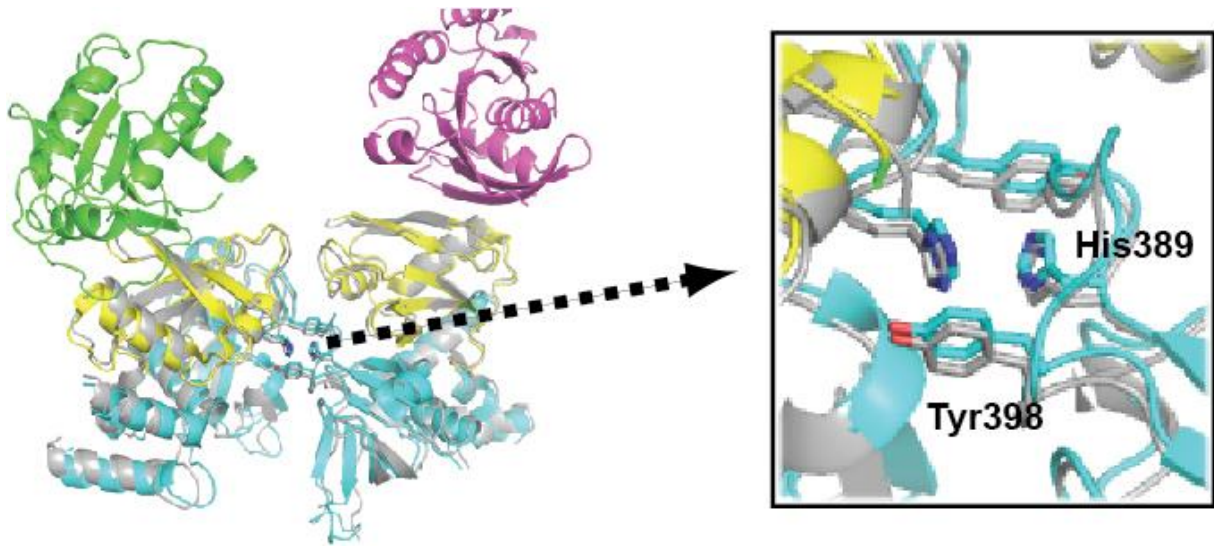

**Figure S1. The “H-Y” putative interface. Related to Figure 1.**

Superposition of the CC-RA-PH dimer for the original structure (3TCA) and the RA-PH: RAP1 complex dimer (4KVG) reveals a pseudo-symmetrical interface via the PH domains. The CC-RA-PH dimer is colored grey. In the RA-PH: RAP1 complex structure, the RA domain is colored yellow; the PH domain is in cyan; and RAP1 is in green or magenta. His389 and Tyr398 at the “H-Y” interface are shown in the right.

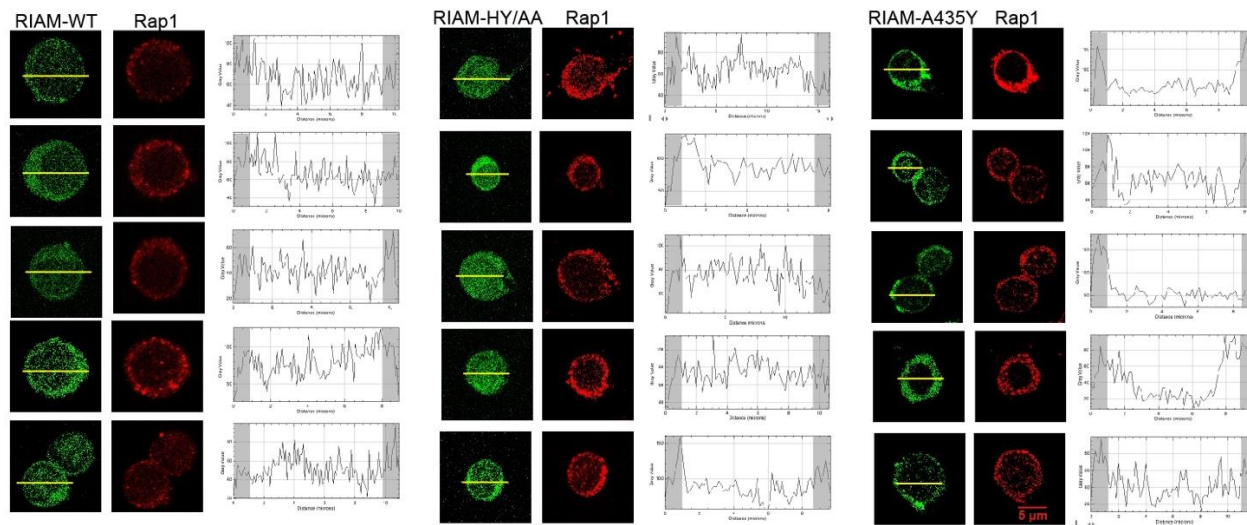

**Figure S2. The PM translocation of RIAM. Related to Figure 2.**

Co-expression of the HA-tagged RAP1G12V and GFP-tagged RIAM FL and mutations in Jurkat T cells. Portions defined as the PM distribution are indicated by the shadowed areas in the plots. For each sample, five cells are shown and plotted for PM co-localization of RIAM and RAP1.

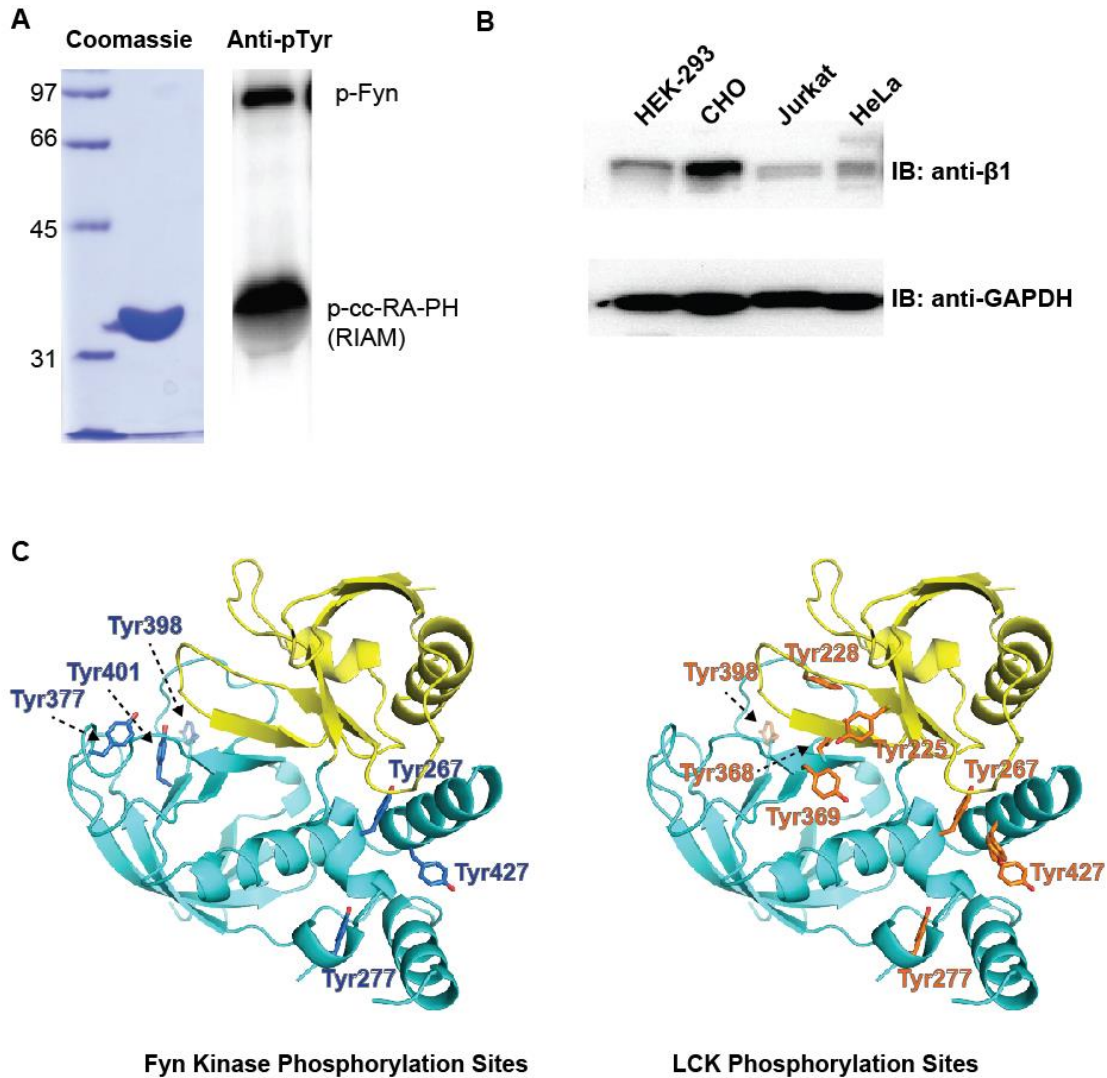

**Figure S3. Tyrosine phosphorylation of RIAM by Src kinases. Related to Figures 3 and 4.**

**A.** Tyrosine phosphorylation of RIAM cc-RA-PH by purified Fyn kinase. **B.** Expression level of endogenous  $\beta_1$  integrin in HEK2993, CHO, Jurkat T, and HeLa cells. **C. Left:** Tyrosine phosphorylation sites in RIAM RA-PH by Fyn kinase identified by mass spectrometry analysis. **Right:** Tyrosine phosphorylation sites in RIAM RA-PH by LCK identified by mass spectrometry analysis. The four common sites are shown in Figure 4A.

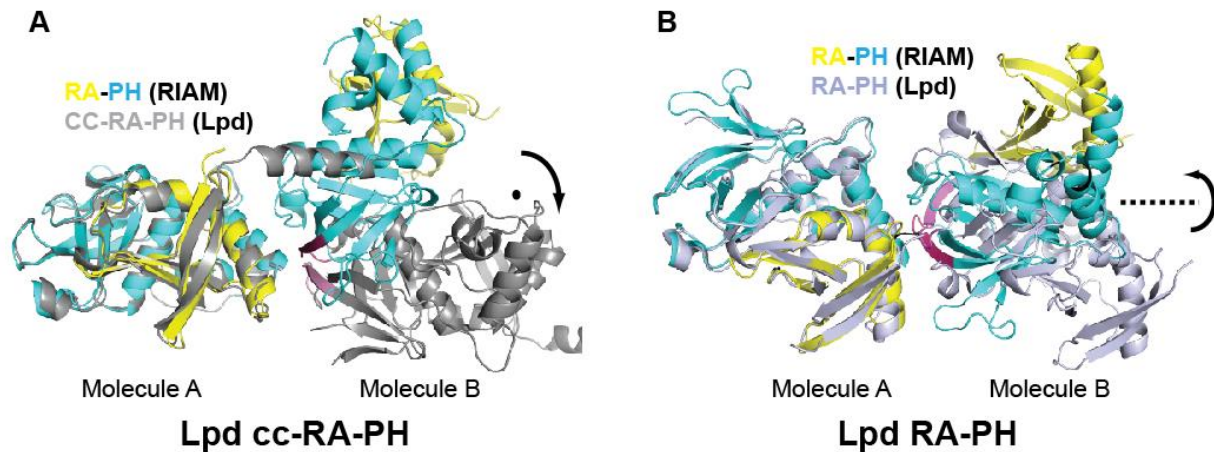

**Figure S4. Similar intermolecular interface observed in Lpd structures. Related to Figures 1 and 2.**

**A.** Superposition of the RIAM RA-PH alone structure (yellow/cyan) and the Lpd CC-RA-PH structure (gray). For each structure, two molecules (A and B) are shown, with one molecule on the left side (molecule A) superimposed. The phosphoinositide-binding site in molecule B are colored magenta (RIAM) or pink (Lpd). The relative positions of the of the two molecule B are indicated by the rotation arrow. **B.** RIAM RA-PH alone structure (yellow/cyan) and the Lpd RA-PH structure (light blue) were superimposed in a similar way as seen in panel A. The phosphoinositide-binding site in the molecule B are colored light pink (Lpd) and magenta (RIAM). The relative positions of the two molecule B are indicated by the rotation arrow.

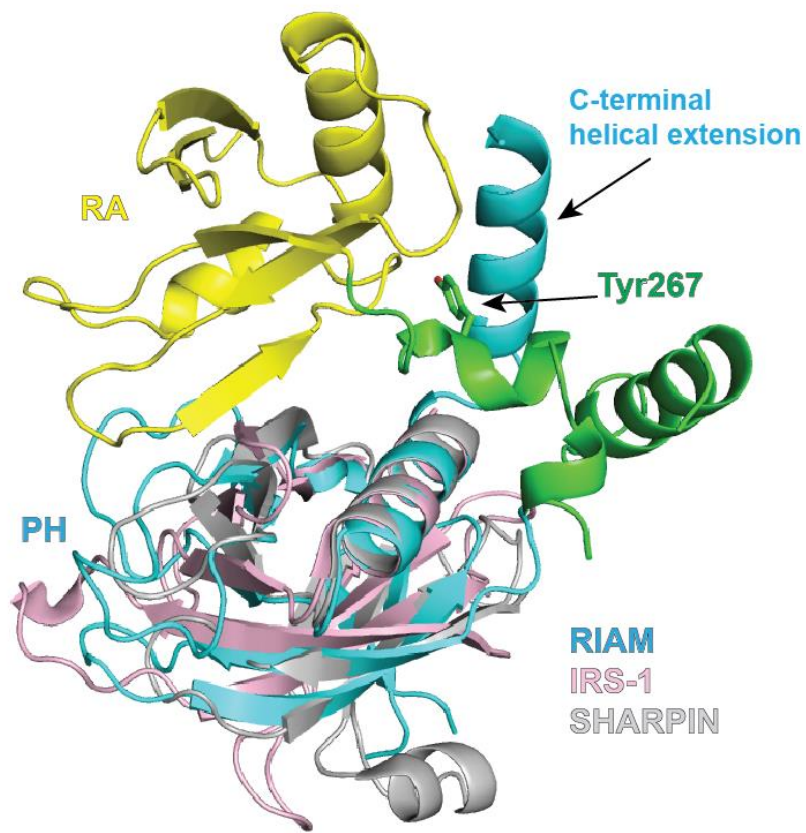

**Figure S5. Comparing the PH domain of RIAM with other canonical PH domains. Related to Figure 4.**

RIAM PH domain was superimposed with the PH domains of SHARPIN (gray) and IRS-1 (light pink). Connection region that links the RA (yellow) and PH (cyan) domains in RIAM is colored in green. The C-terminal helical extension is indicated. Side chain of Tyr267 is shown in stick representation.

**Supplemental Table 1. Lists of data points. Related to Figures 3 and 4.**

**Figure 3E**

|             | I.   | II.  | III. | Mean | STDEV | t-test (2-tailed) | Vs.                       |
|-------------|------|------|------|------|-------|-------------------|---------------------------|
| Untreated   | 1.00 | 1.00 | 1.00 | 1.00 | 0.000 |                   |                           |
| RK-24466    | 1.06 | 0.87 | 0.83 | 0.92 | 0.125 | N.S.              | Untreated vs. RK          |
| anti-CD3    | 1.21 | 1.30 | 1.19 | 1.23 | 0.059 | 0.020979          | Untreated vs. anti-CD3    |
| anti-CD3+RK | 0.72 | 0.55 | 0.51 | 0.59 | 0.108 | 0.022635          | Untreated vs. anti-CD3+RK |
|             |      |      |      |      |       | 0.014405          | anti-CD3 vs. anti-CD3+RK  |

**Figure 3F**

|                     | I.    | II.   | III.  | Mean  | STDEV | Normalized Mean | Normalized STDEV | t-test (2-tailed) vs. DMSO |
|---------------------|-------|-------|-------|-------|-------|-----------------|------------------|----------------------------|
| uncoated            | 0.067 | 0.067 | 0.072 | 0.069 | 0.003 | 0.531           | 0.023            |                            |
| unstimulated        | 0.122 | 0.107 | 0.161 | 0.130 | 0.028 | 1.000           | 0.214            |                            |
| PMA                 | 0.420 | 0.379 | 0.439 | 0.413 | 0.031 | 3.170           | 0.236            |                            |
| anti-CD3            | 0.326 | 0.300 | 0.407 | 0.344 | 0.056 | 2.650           | 0.429            |                            |
| anti-CD3+DMSO       | 0.339 | 0.308 | 0.316 | 0.321 | 0.016 | 2.470           | 0.124            |                            |
| anti-CD3+5 $\mu$ M  | 0.186 | 0.185 | 0.215 | 0.195 | 0.017 | 1.500           | 0.131            | 0.014078                   |
| anti-CD3+10 $\mu$ M | 0.189 | 0.189 | 0.181 | 0.186 | 0.005 | 1.430           | 0.036            | 0.004388                   |
| anti-CD3+20 $\mu$ M | 0.151 | 0.144 | 0.149 | 0.148 | 0.004 | 1.140           | 0.028            | 0.001899                   |

**Figure 3G**

|             | I.    | II.   | III.  | Mean  | STDEV | Normalized Mean | Normalized STDEV | t-test (2-tailed) vs. DMSO |
|-------------|-------|-------|-------|-------|-------|-----------------|------------------|----------------------------|
| Uncoated    | 0.105 | 0.099 | 0.105 | 0.103 | 0.004 | 1.000           | 0.034            |                            |
| DMSO        | 1.212 | 1.094 | 1.608 | 1.305 | 0.269 | 12.670          | 2.614            |                            |
| 10 $\mu$ M  | 0.710 | 0.665 | 0.641 | 0.672 | 0.035 | 6.520           | 0.340            | 0.064173                   |
| 50 $\mu$ M  | 0.420 | 0.417 | 0.459 | 0.432 | 0.023 | 4.190           | 0.228            | 0.025505                   |
| 100 $\mu$ M | 0.233 | 0.212 | 0.207 | 0.217 | 0.014 | 2.110           | 0.134            | 0.020800                   |

**Figure 4E**

| RAP1G12V+ | I.   | II.  | III. | Mean | STDEV | t-test (2-tailed) | Vs.          |
|-----------|------|------|------|------|-------|-------------------|--------------|
| RIAM WT   | 1.00 | 1.00 | 1.00 | 1.00 | 0.000 |                   |              |
| Y267F     | 0.71 | 0.73 | 0.65 | 0.69 | 0.042 | 0.006309          | WT vs. Y267F |
| Y427F     | 0.51 | 0.71 | 0.59 | 0.60 | 0.104 | 0.021833          | WT vs. Y427F |
| A435Y     | 1.63 | 1.88 | 1.81 | 1.77 | 0.127 | 0.008885          | WT vs. A435Y |
| YY/EE     | 0.68 | 0.99 | 1.01 | 0.89 | 0.181 | N.S.              | WT vs. YY/EE |

N.S.: Not Significant.
